# Supplementary material for: Ferroptosis-related local immune cytolytic activity in tumor microenvironment of basal cell and squamous cell carcinoma
Source: publisher site journal article supplement (doi:10.18632/aging.204057), 2022-05-02
Supplement: Supplementary file [file aging-v14i9-204057-supplementary-material-SD1.pdf]

# SUPPLEMENTARY FIGURES

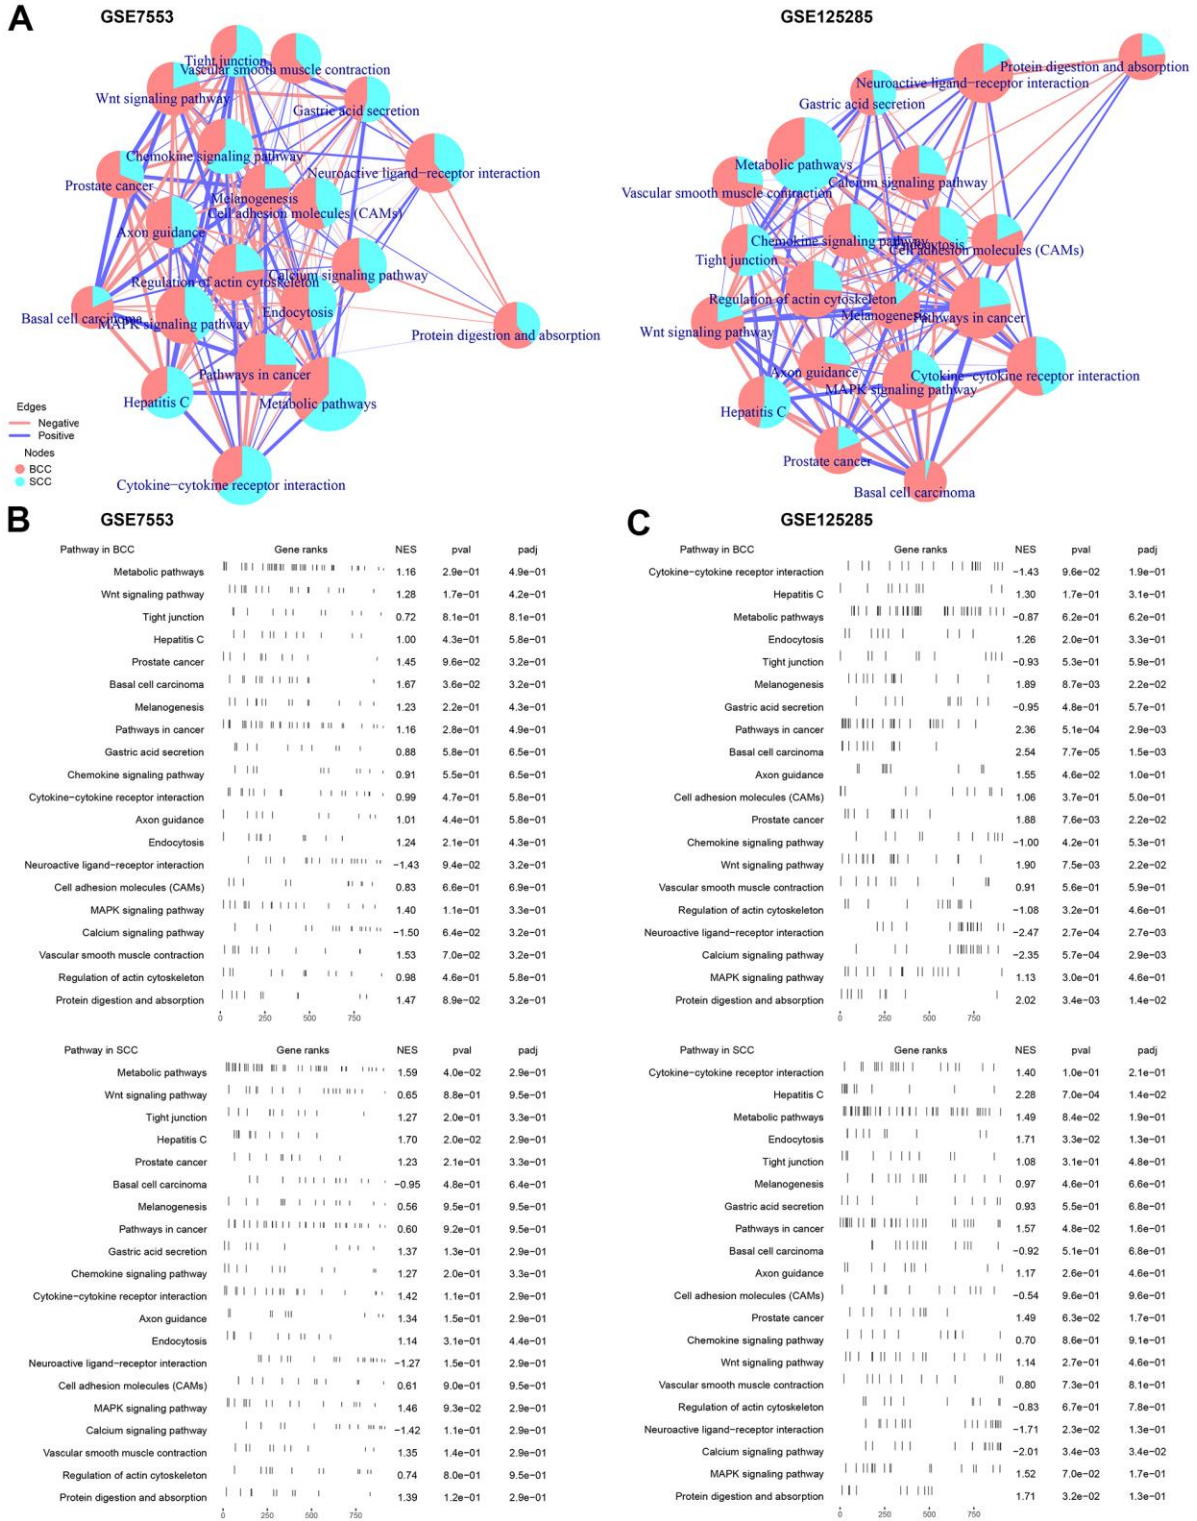

**Supplementary Figure 1. KEGG and GSEA enrichment results of DEGs geneset. (A)** The top 20 KEGG pathways interactive network for the overall score share of BCC and SCC. **(B, C)** GSEA enrichment results of BCC and SCC in GSE7533 and GSE125285.

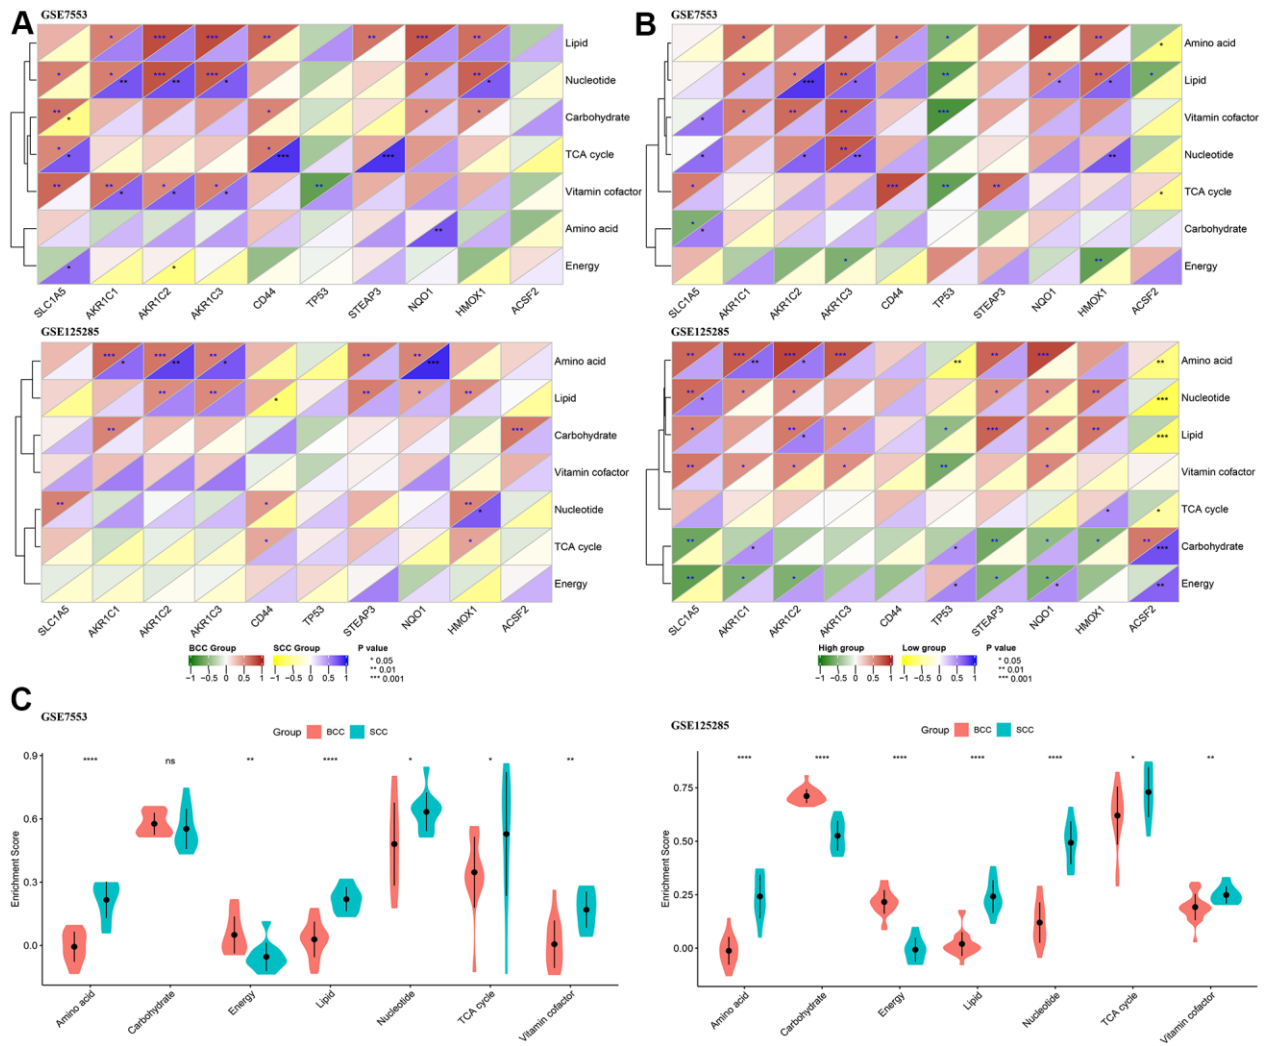

**Supplementary Figure 2. Correlation difference between ferroptosis genes and tumor microenvironment (TME) metabolic functions.** (A) Difference in Pearson correlation of TME metabolic functions and ferroptosis genes expression between BCC and SCC. (B) Difference in Pearson correlation of ferroptosis genes higher/lower expression level and TME. (C) Comparison of TME metabolic function between BCC and SCC. (\* $P < 0.05$ , \*\* $P < 0.01$ , \*\*\* $P < 0.001$ , \*\*\*\* $P < 0.0001$ ).

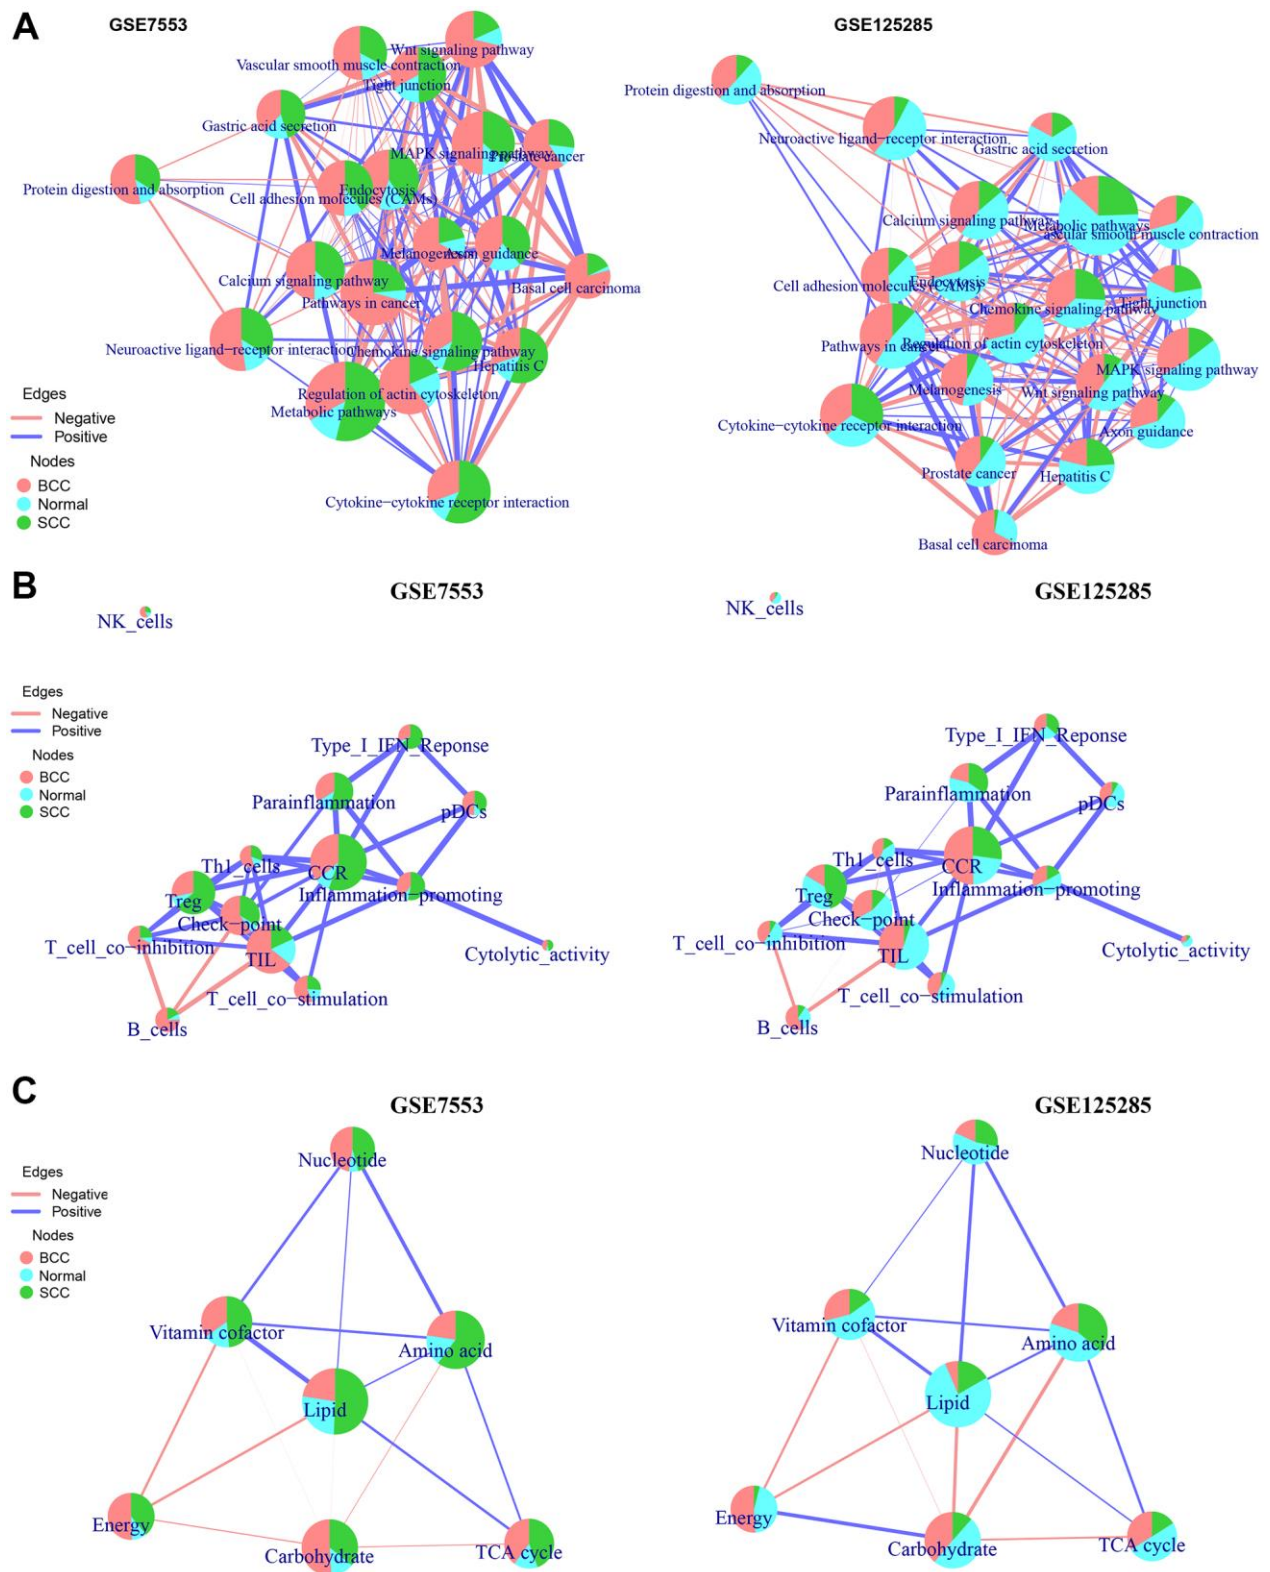

**Supplementary Figure 3.** Enrichment results of KEGG (A), LICA (B) and TME metabolic function (C) in overall score share of interactive network of BCC, SCC and (adjacent) normal tissues.

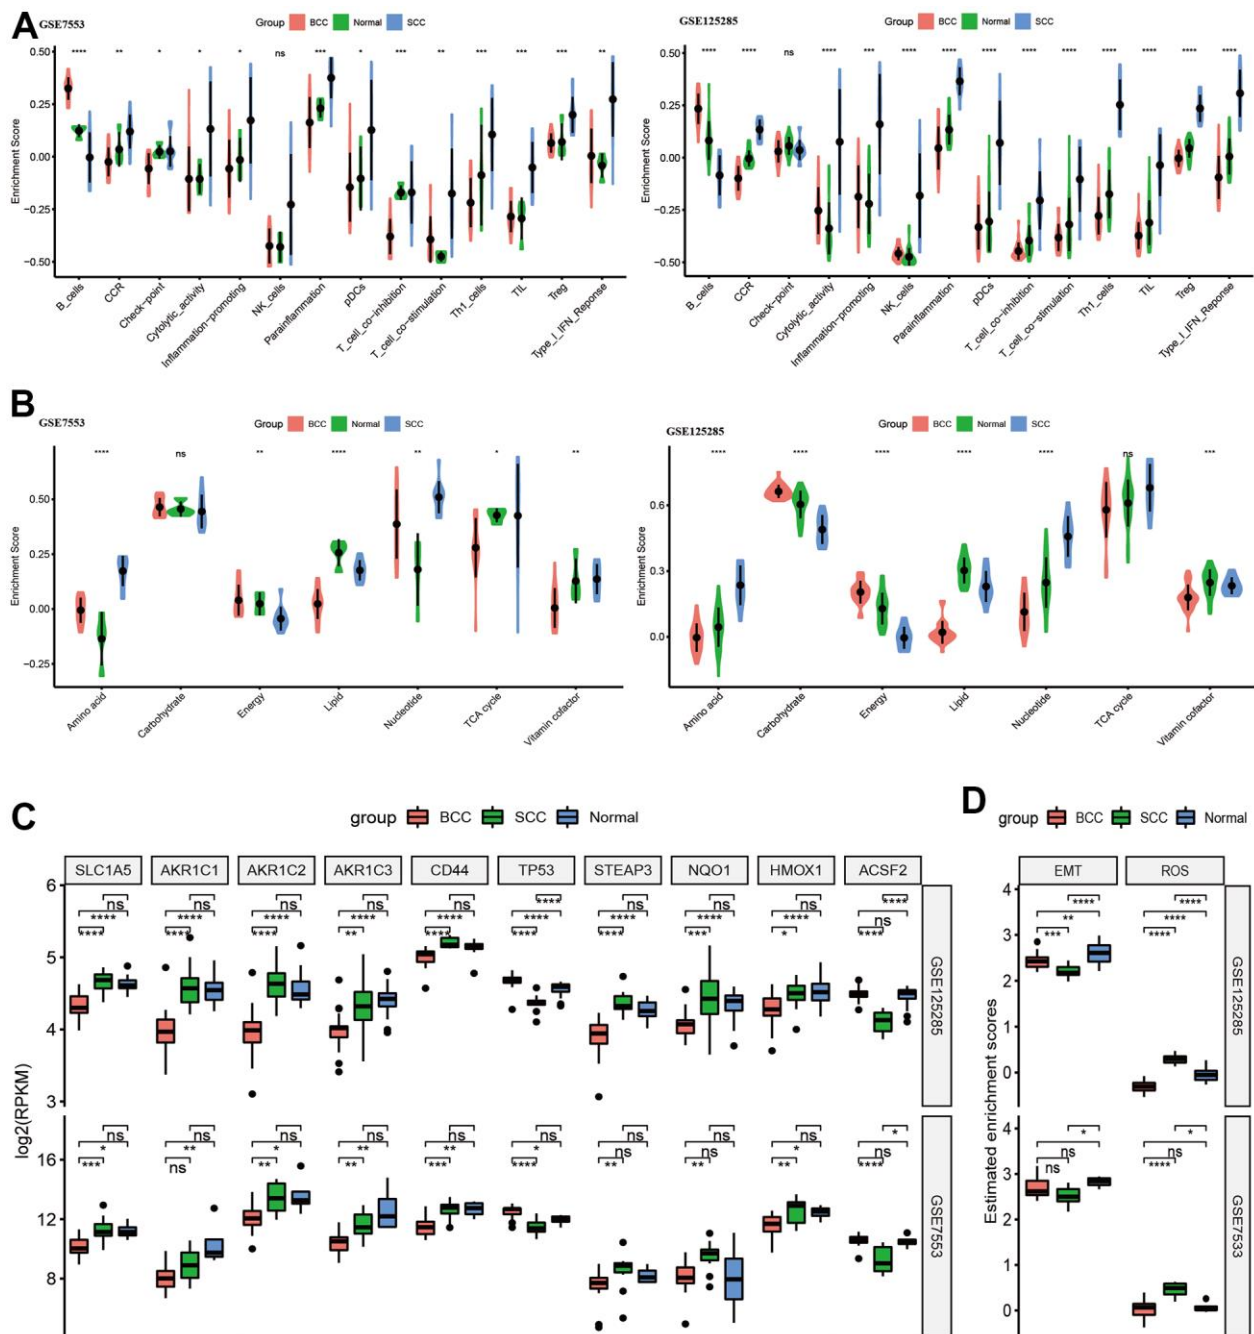

**Supplementary Figure 4. The difference in GSEA(ssGSEA) enrichment results and ferroptosis genes expression of BCC, SCC and adjacent/normal groups. (A, B) Difference in LICA and TME metabolic function between BCC, SCC and adjacent/normal groups. (C) Difference in ferroptosis genes expression between BCC, SCC and adjacent/normal groups. (D) Difference in EMT and ROS estimated enrichment score between BCC, SCC and adjacent/normal groups. (\*P<0.05, \*\*P<0.01, \*\*\*P<0.001, \*\*\*\*P<0.0001).**
